# Supplementary material for: Synthesis and water absorption of galactose-containing amphiphilic triblock copolymers based on PLAs
Source: Royal Society of Chemistry journal article supplement (doi:10.1039/c3nj01336g), 2013-11-22
Supplement: c3nj01336g.pdf [file c3nj01336g.pdf]

## Electronic Supplementary Information (ESI)

### **Synthesis and water absorption of galactose-containing amphiphilic triblock copolymers based on PLA**

**Tieshi Wang,<sup>a</sup> Xinde Tang,<sup>\*b</sup> Qun Zhang,<sup>a</sup> Faqi Yu,<sup>a</sup> Wenjuan Guo,<sup>a</sup>  
Guangyou Zhang<sup>a</sup> and Meishan Pei<sup>\*a</sup>**

*<sup>a</sup>School of Chemistry and Chemical Engineering, University of Jinan, Jinan 250022,  
China*

*<sup>b</sup>School of Material Science and Engineering, Shandong Jiaotong University, Jinan  
250023, China*

## Experimental

### *Materials*

Methacryloyl chloride (Aladdin, 95%) and  $\alpha$ -bromoisobutyryl bromide (Aladdin, 98%) were distilled under reduced pressure. L-lactic acid was purchased from Aladdin Chemical Reagent. Tetrahydrofuran was refluxed for 24 h over sodium and distilled before use. 6-*O*-Methacryloyl-1,2,3,4-di-*O*-isopropylidene-D-galactopyranose (MalpGP) was prepared as reported,<sup>1,2</sup> and its <sup>1</sup>H NMR (400 MHz, CDCl<sub>3</sub>,  $\delta$ , ppm): 1.33–1.54 (m, 12H, –CH<sub>3</sub>), 1.90–2.02 (s, 3H, –CH<sub>3</sub>), 4.01–4.18, 4.24–4.33, 4.59–4.66, and 5.54 (7H, sugar moiety), 5.50–5.63 and 6.02–6.10 (s, 2H, =CH<sub>2</sub>). All other reagents of analytical grade were purchased from Sinopharm Chemical Reagent and used without further purification.

### *Synthesis of Double-hydroxyl-terminated Polylactide (HO-PLA-OH)*

HO-PLA-OH were synthesized by condensation polymerization. 50g L-lactic acid (0.55 mol) was added into a reaction flask (100 mL) containing a stirring bar under a dry nitrogen atmosphere. The solution was heated to 80 °C and pressure to 250 mm Hg for 2 h in order to remove free water in L-lactic acid. 1,4-Butylene glycol and Sn(ot)<sub>2</sub> were then added through the rubber stopper with a syringe and stainless steel capillary.<sup>39</sup> The mixture was stirred and heated to 180 °C under the pressure of 10 mm Hg for another 5 h. The polymer was then selectively precipitated in a large volume of cold hexane, filtrated, and dried under reduced pressure until constant weight. <sup>1</sup>H NMR (400 MHz, CDCl<sub>3</sub>,  $\delta$  ppm): 5.12–5.19 (CH, PLA), 3.72 (terminal CH, PLA), 1.50–1.56 (CH<sub>3</sub>, PLA), 1.21–1.28 (terminal CH<sub>3</sub>, PLA), 4.34 (terminal CH<sub>2</sub>, initiator), 4.14 (middle CH<sub>2</sub>, initiator).

### *Synthesis of $\alpha$ -Bromoisobutyrate Polylactide Macroinitiator (Br-PLA-Br)*

The HO-PLA-OH was quantitatively converted into ATRP initiator (Br-PLA-Br) via esterification with  $\alpha$ -bromoisobutyryl bromide using a known procedure. For instance, PLA (7.46g, 1.00 mmol) and excess of triethylamine (0.51 mL, 4.00 mmol) were

dissolved in dichloromethane (20 mL). The flask was placed in an ice-water bath. Then  $\alpha$ -bromoisobutyryl bromide (0.97 mL, 8.00 mmol) was added dropwise during 1 h under dry nitrogen, subsequently the temperature was allowed to room temperature. The reaction was continued under stirring for 18 h. The solution was filtered, half of the solvent was evaporated, and the Br-PLA-Br macroinitiator was precipitated in cold hexane, followed by filtration and drying in vacuum until constant weight.  $^1\text{H}$  NMR (400 MHz,  $\text{CDCl}_3$ ,  $\delta$  ppm): 5.12-5.19 (CH, PLA), 1.90 ( $\text{C}(\text{Br})(\text{CH}_3)_2$ ), 1.50-1.56 ( $\text{CH}_3$ , PLA), 4.34 (terminal  $\text{CH}_2$ , initiator), 4.14 (middle  $\text{CH}_2$ , initiator).

### ***Synthesis of PMAIpGP-PLA-PMAIpGP***

The triblock copolymers were synthesized by ATRP of MAIpGP using the Br-PLA-Br samples as macroinitiators and  $\text{CuBr}/\text{Me}_6\text{TREN}$  as catalyst system. The synthesis of PMAIpGP-PLA-PMAIpGP was given below as a typical example. Br-PLA-Br (386.50 mg, 0.05 mmol), MAIpGP (328.00 mg, 1.00 mmol),  $\text{CuBr}$  (15.00 mg, 0.10 mmol),  $\text{Me}_6\text{TREN}$  (28.00  $\mu\text{L}$ , 0.20 mmol), and anisol (2 mL) were added to a 10 mL Schlenk flask, immediately the mixture was frozen in liquid nitrogen, and a vacuum was applied. After three freeze-pump-thaw cycles, the flask was sealed in vacuum and placed in an oil bath preheated at 90 °C. The reaction lasted 10 h and the reaction was stopped by dilution with THF. Then the mixture was passed through a neutral aluminum column to remove the catalyst. The polymer was purified three times by precipitation in excess of hexane, collected by filtration, and dried in a vacuum oven for 24 h.

### ***Synthesis of PMAGP-PLA-PMAGP***

The triblock copolymer PMAIpGP-PLA-PMAIpGP (1.0 g) was dissolved in 10 mL of  $\text{CF}_3\text{COOH}/\text{H}_2\text{O}$  (9/1 V/V), the mixture was stirred at room temperature overnight, precipitated in absolute methanol, and dried in vacuum at room temperature. The product was obtained in 92% yield as a white powder. All other copolymers were treated in the same manner.

### ***Preparation of polymers films***

The hydrophilic properties of polymers were studied on cast films obtained by

evaporation using polymer solutions in *N,N*-dimethylformamide at room temperature. Equiweight amounts of HO-PLA-OH, PMAGP<sub>8</sub>-b-PLA<sub>100</sub>-b-PMAGP<sub>8</sub>, PMAGP<sub>13</sub>-b-PLA<sub>100</sub>-b-PMAGP<sub>13</sub>, PMAGP<sub>16</sub>-b-PLA<sub>100</sub>-b-PMAGP<sub>16</sub>, PMAGP<sub>24</sub>-b-PLA<sub>100</sub>-b-PMAGP<sub>24</sub>, and PMAGP<sub>28</sub>-b-PLA<sub>100</sub>-b-PMAGP<sub>28</sub> were dissolved in *N,N*-dimethylformamide with an identical concentration, then cast on a glass petri dish surface.

### Characterization

<sup>1</sup>H NMR spectra were measured using a Bruker 400 MHz spectrometer at room temperature. Chemical shifts were referenced to tetramethyl silane (TMS). The static contact angle of water drop deposited onto film surface was measured using a drop shape analysis system OCA40 at room temperature.

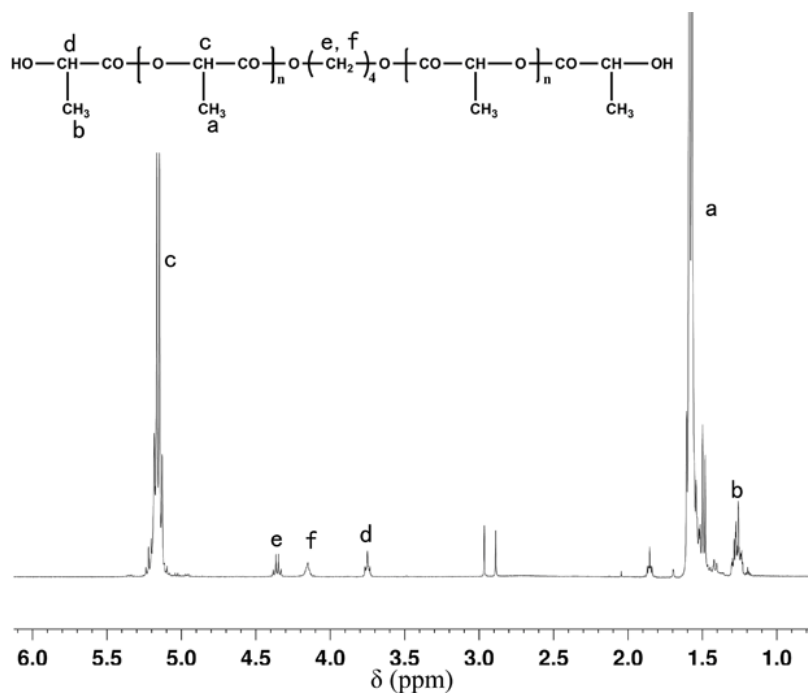

Fig. S1 <sup>1</sup>H NMR spectrum of HO-PLA-OH recorded in CDCl<sub>3</sub>.

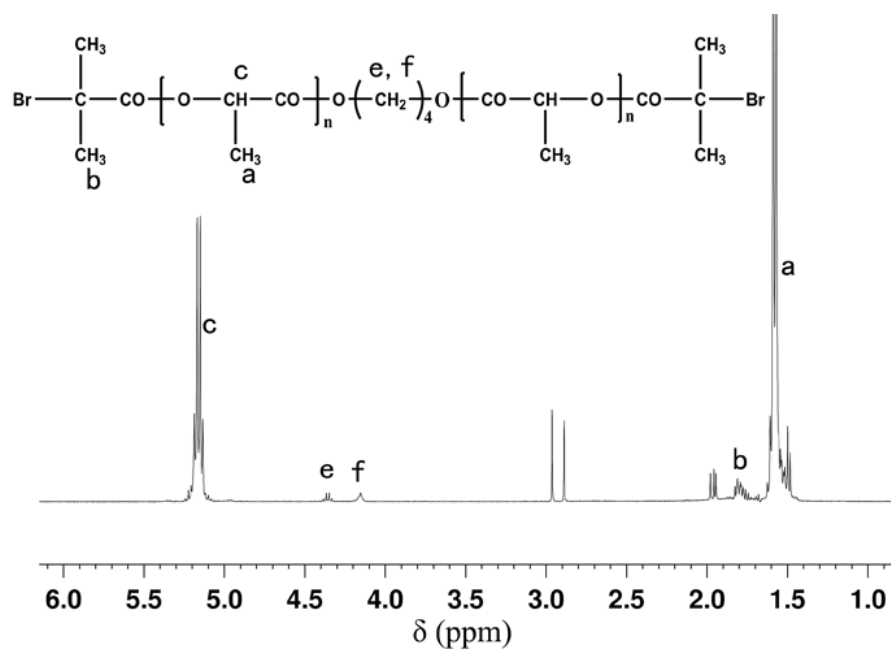

Fig. S2  $^1\text{H}$  NMR spectrum of Br-PLA-Br recorded in  $\text{CDCl}_3$ .

Table S1 Macromolecular Characteristics of PLA and PMAIpGP-PLA-PMAIpGP.

| sample                                                           | $[\text{PLA}]_0/[\text{MAIpGP}]_0^a$ | $M_{n,\text{NMR}}^b$ | $[\text{PLA}]/[\text{MAIpGP}]^c$ |
|------------------------------------------------------------------|--------------------------------------|----------------------|----------------------------------|
| PLA <sub>100</sub>                                               | 1:0                                  | 7460                 | -                                |
| PMAIpGP <sub>8</sub> -PLA <sub>100</sub> -PMAIpGP <sub>8</sub>   | 1:20                                 | 12710                | 100:16                           |
| PMAIpGP <sub>13</sub> -PLA <sub>100</sub> -PMAIpGP <sub>13</sub> | 1:30                                 | 15980                | 100:26                           |
| PMAIpGP <sub>16</sub> -PLA <sub>100</sub> -PMAIpGP <sub>16</sub> | 1:40                                 | 17956                | 100:32                           |
| PMAIpGP <sub>24</sub> -PLA <sub>100</sub> -PMAIpGP <sub>24</sub> | 1:50                                 | 23204                | 100:48                           |
| PMAIpGP <sub>28</sub> -PLA <sub>100</sub> -PMAIpGP <sub>28</sub> | 1:60                                 | 25828                | 100:56                           |

<sup>a</sup>  $[\text{PLA}]_0/[\text{MAIpGP}]_0$  represents the feed molar ratio of PLA and MAIpGP

<sup>b</sup> Determined by  $^1\text{H}$  NMR (g/mol)

<sup>c</sup> Determined by  $^1\text{H}$  NMR,  $[\text{PLA}]/[\text{MAIpGP}]$  represents the repeat units molar ratio of  $[\text{OCCH}(\text{CH}_3)\text{O}]$  and MAIpGP in the resultant polymers.

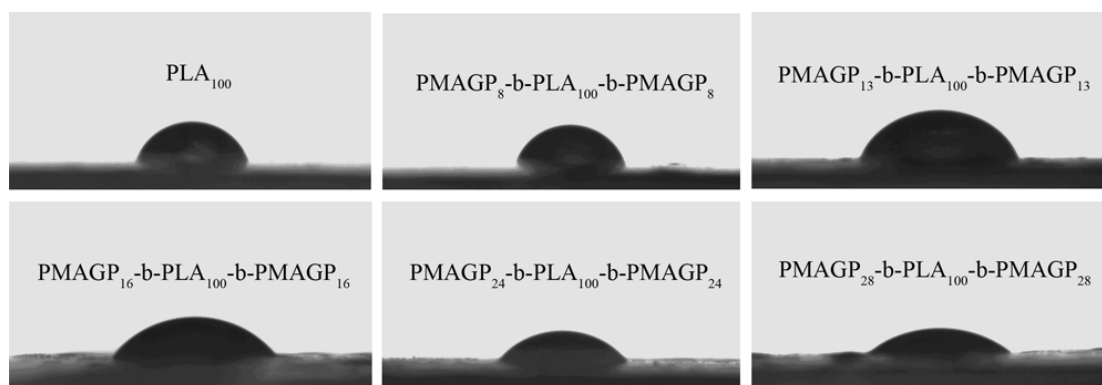

Fig. S3 Recorded images of water drops ( $10 \mu\text{L}$ ) deposited on the surface of films of  $\text{PLA}_{100}$ ,  $\text{PMAGP}_8\text{-b-PLA}_{100}\text{-b-PMAGP}_8$ ,  $\text{PMAGP}_{13}\text{-b-PLA}_{100}\text{-b-PMAGP}_{13}$ ,  $\text{PMAGP}_{16}\text{-b-PLA}_{100}\text{-b-PMAGP}_{16}$ ,  $\text{PMAGP}_{24}\text{-b-PLA}_{100}\text{-b-PMAGP}_{24}$  and  $\text{PMAGP}_{28}\text{-b-PLA}_{100}\text{-b-PMAGP}_{28}$ .

Table S2 Water contact angle and water absorption of the polymer films

| Sample                                                          | Water contact angle ( $^\circ$ ) |      |      |      | Water absorption(%) |
|-----------------------------------------------------------------|----------------------------------|------|------|------|---------------------|
| $\text{PLA}_{100}$ film                                         | 78.5                             | 77.6 | 79.1 | 78.1 | 39.2                |
| $\text{PMAGP}_8\text{-b-PLA}_{100}\text{-b-PMAGP}_8$ film       | 71.6                             | 72.3 | 72.1 | 70.5 | 64.3                |
| $\text{PMAGP}_{13}\text{-b-PLA}_{100}\text{-b-PMAGP}_{13}$ film | 69.4                             | 68.8 | 67.4 | 68.3 | 80.0                |
| $\text{PMAGP}_{16}\text{-b-PLA}_{100}\text{-b-PMAGP}_{16}$ film | 66.4                             | 65.3 | 66.5 | 65.8 | 127.7               |
| $\text{PMAGP}_{24}\text{-b-PLA}_{100}\text{-b-PMAGP}_{24}$ film | 49.6                             | 51.1 | 50.3 | 51.7 | 131.3               |
| $\text{PMAGP}_{28}\text{-b-PLA}_{100}\text{-b-PMAGP}_{28}$ film | 40.1                             | 39.3 | 39.1 | 40.3 | 138.5               |

### ***Dyeing Procedure***

The films of PLA and the copolymer (P1, P2, P3, P4, and P5) were soaked in beet red aqueous solution for 2 h at room temperature, and then washed the residual dye on the surface of films by deionized water before observation.

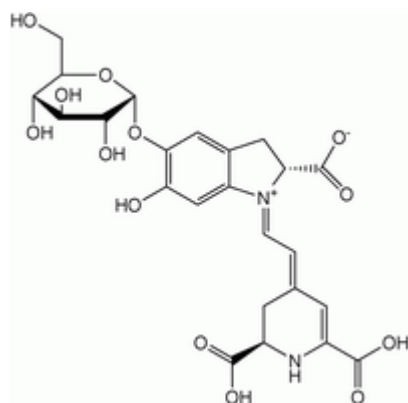

Fig. S4 Molecular structure of beet red.

## References

1. J. Q. Meng, F. S. Du, Y. S. Li and Z. C. Li, *J. Polym. Sci. Part A: Polym. Chem.*, 2005, **43**, 752.
2. Y. M. Chen and G. Wulff, *Macromol. Rapid Commun.*, 2002, **23**, 59.
